# Supplementary material for: Cost Effectiveness and Budget Impact Analyses of Influenza Vaccination for Prisoners in Thailand: An Application of System Dynamic Modelling
Source: MDPI journal article supplement (doi:10.3390/ijerph17041247), 2020-02-14

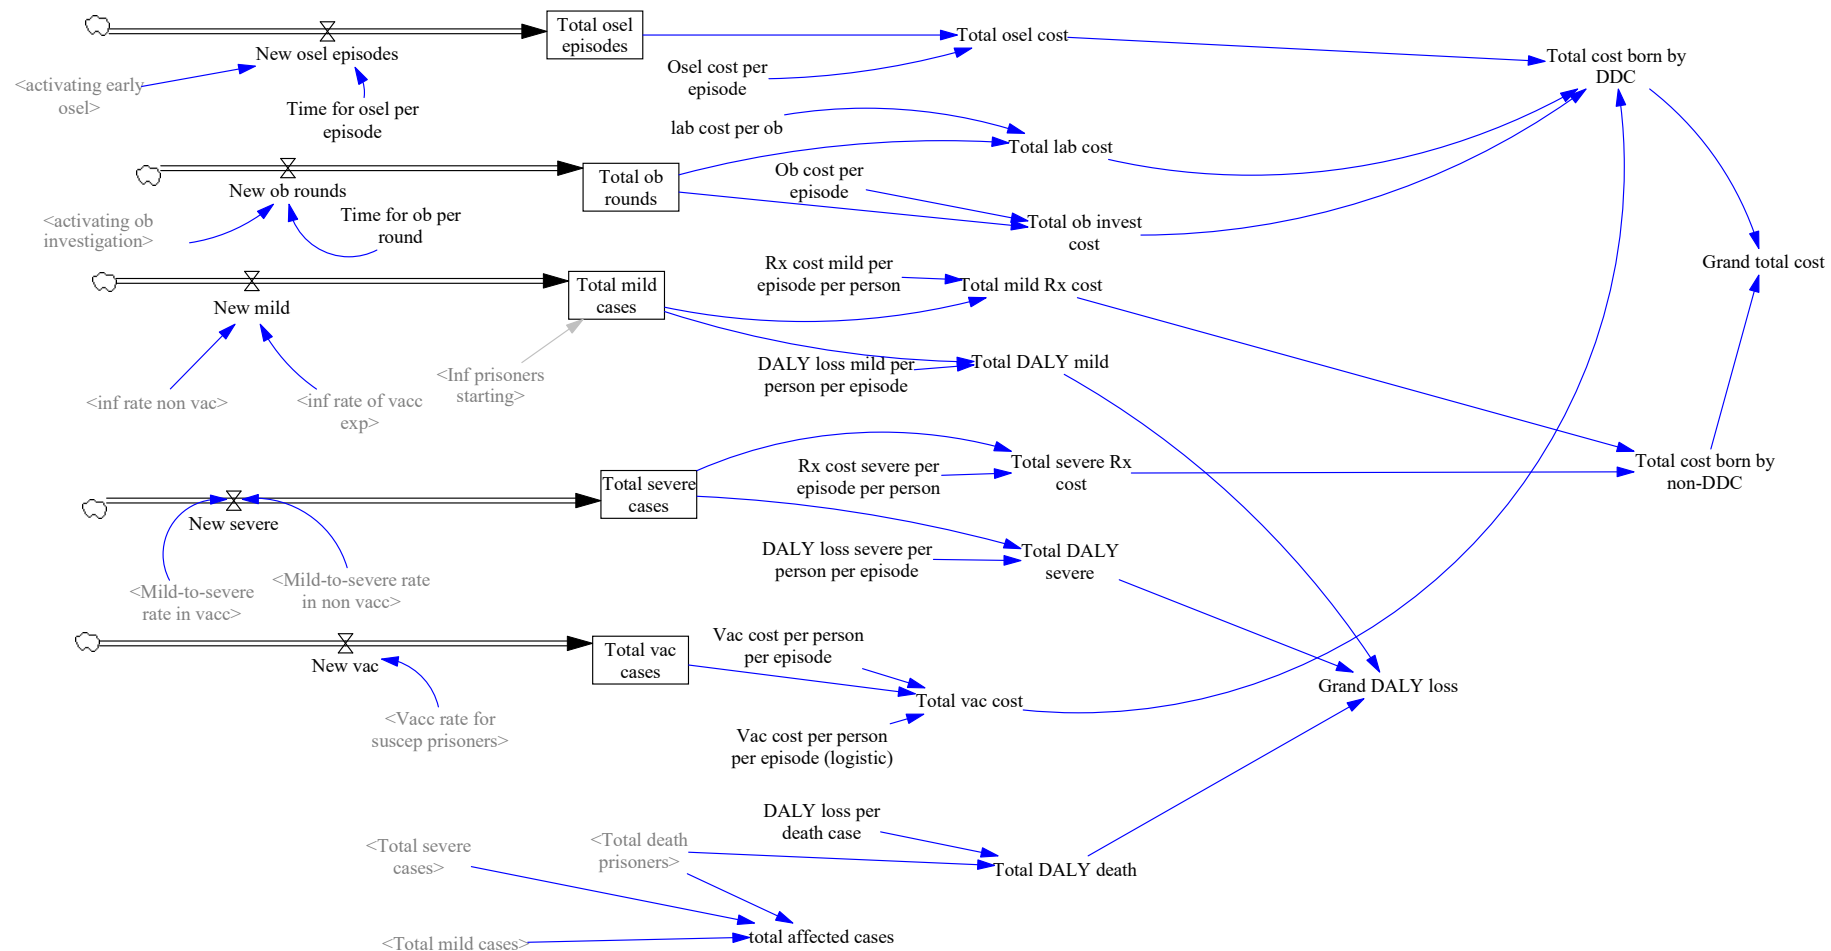

Supplement: s1 [file s1]
